# Supplementary material for: Double Deletion of PI3K and PTEN Modifies Lens Postnatal Growth and Homeostasis
Source: MDPI journal article supplement (doi:10.3390/cells11172708), 2022-08-30
Supplement: s1 [file s1]

Supplementary Table S1. Number of lenses analyzed per age and genotype for Figure 2.

| Figure 2, panels a and c |           |                  |         |                         |
|--------------------------|-----------|------------------|---------|-------------------------|
| Age                      | Wild-type | p110 $\alpha$ KO | PTEN KO | p110 $\alpha$ /PTEN dKO |
| P0                       | 18        | 25               | 5       | 20                      |
| P2                       | 7         | 37               | 9       | 4                       |
| 1 week                   | 38        | 52               | 30      | 52                      |
| 5 weeks                  | 62        | 59               | 52      | 56                      |
| 8 weeks                  | 22        | 0                | 0       | 18                      |
| 12 weeks                 | 48        | 64               | 39      | 50                      |
| 24 weeks                 | 58        | 63               | 46      | 64                      |

| Figure 2, panel b |           |                         |
|-------------------|-----------|-------------------------|
| Age               | Wild-type | p110 $\alpha$ /PTEN dKO |
| 1 week            | 20        | 24                      |
| 2 weeks           | 16        | 6                       |
| 5 weeks           | 36        | 26                      |
| 8 weeks           | 22        | 18                      |
| 12 weeks          | 42        | 42                      |
