# Supplementary material for: Double Deletion of PI3K and PTEN Modifies Lens Postnatal Growth and Homeostasis
Source: MDPI journal article supplement (doi:10.3390/cells11172708), 2022-08-30
Supplement: s1 [file s1]

Supplementary Table S2. Statistical comparison of lens and eye growth between wild-type and p110 $\alpha$ /PTEN dKO mice from the data presented in Figure 2.

| Lens growth |                                                          |                                                                        |                             |
|-------------|----------------------------------------------------------|------------------------------------------------------------------------|-----------------------------|
| Age         | Wild-type lens volume [mm <sup>3</sup> ] (mean $\pm$ SD) | p110 $\alpha$ /PTEN dKO lens volume [mm <sup>3</sup> ] (mean $\pm$ SD) | P value (two sample t-test) |
| P0          | 0.50 $\pm$ 0.04                                          | 0.55 $\pm$ 0.11                                                        | 0.068                       |
| P2          | 0.70 $\pm$ 0.06                                          | 0.77 $\pm$ 0.06                                                        | 0.106                       |
| 1 week      | 1.88 $\pm$ 0.24                                          | 1.99 $\pm$ 0.27                                                        | 0.041                       |
| 5 weeks     | 4.89 $\pm$ 0.23                                          | 5.25 $\pm$ 0.39                                                        | 1 X 10 <sup>-8</sup>        |
| 12 weeks    | 6.89 $\pm$ 0.30                                          | 8.43 $\pm$ 0.33                                                        | 1 X 10 <sup>-13</sup>       |

| Eye growth |                                         |                                                       |                             |
|------------|-----------------------------------------|-------------------------------------------------------|-----------------------------|
| Age        | Wild-type eye mass [mg] (mean $\pm$ SD) | p110 $\alpha$ /PTEN dKO eye mass [mg] (mean $\pm$ SD) | P value (two sample t-test) |
| 1 week     | 8.9 $\pm$ 1.9                           | 9.8 $\pm$ 0.7                                         | 0.040                       |
| 2 weeks    | 13.4 $\pm$ 0.5                          | 13.9 $\pm$ 0.5                                        | 0.059                       |
| 5 weeks    | 18.1 $\pm$ 1.1                          | 18.9 $\pm$ 1.5                                        | 0.025                       |
| 8 weeks    | 21.1 $\pm$ 1.2                          | 22.9 $\pm$ 2.0                                        | 0.003                       |
| 12 weeks   | 22.1 $\pm$ 1.5                          | 22.2 $\pm$ 2.2                                        | 0.473                       |
