# Supplementary material for: Double Deletion of PI3K and PTEN Modifies Lens Postnatal Growth and Homeostasis
Source: MDPI journal article supplement (doi:10.3390/cells11172708), 2022-08-30

Original Images for Blots and Gels for the Article:

**Double deletion of PI3K and PTEN modifies lens postnatal growth and homeostasis.**

Caterina Sellitto, Leping Li and Thomas W. White

Full size images for the triplicate blots used to generate the images in Figure 3.

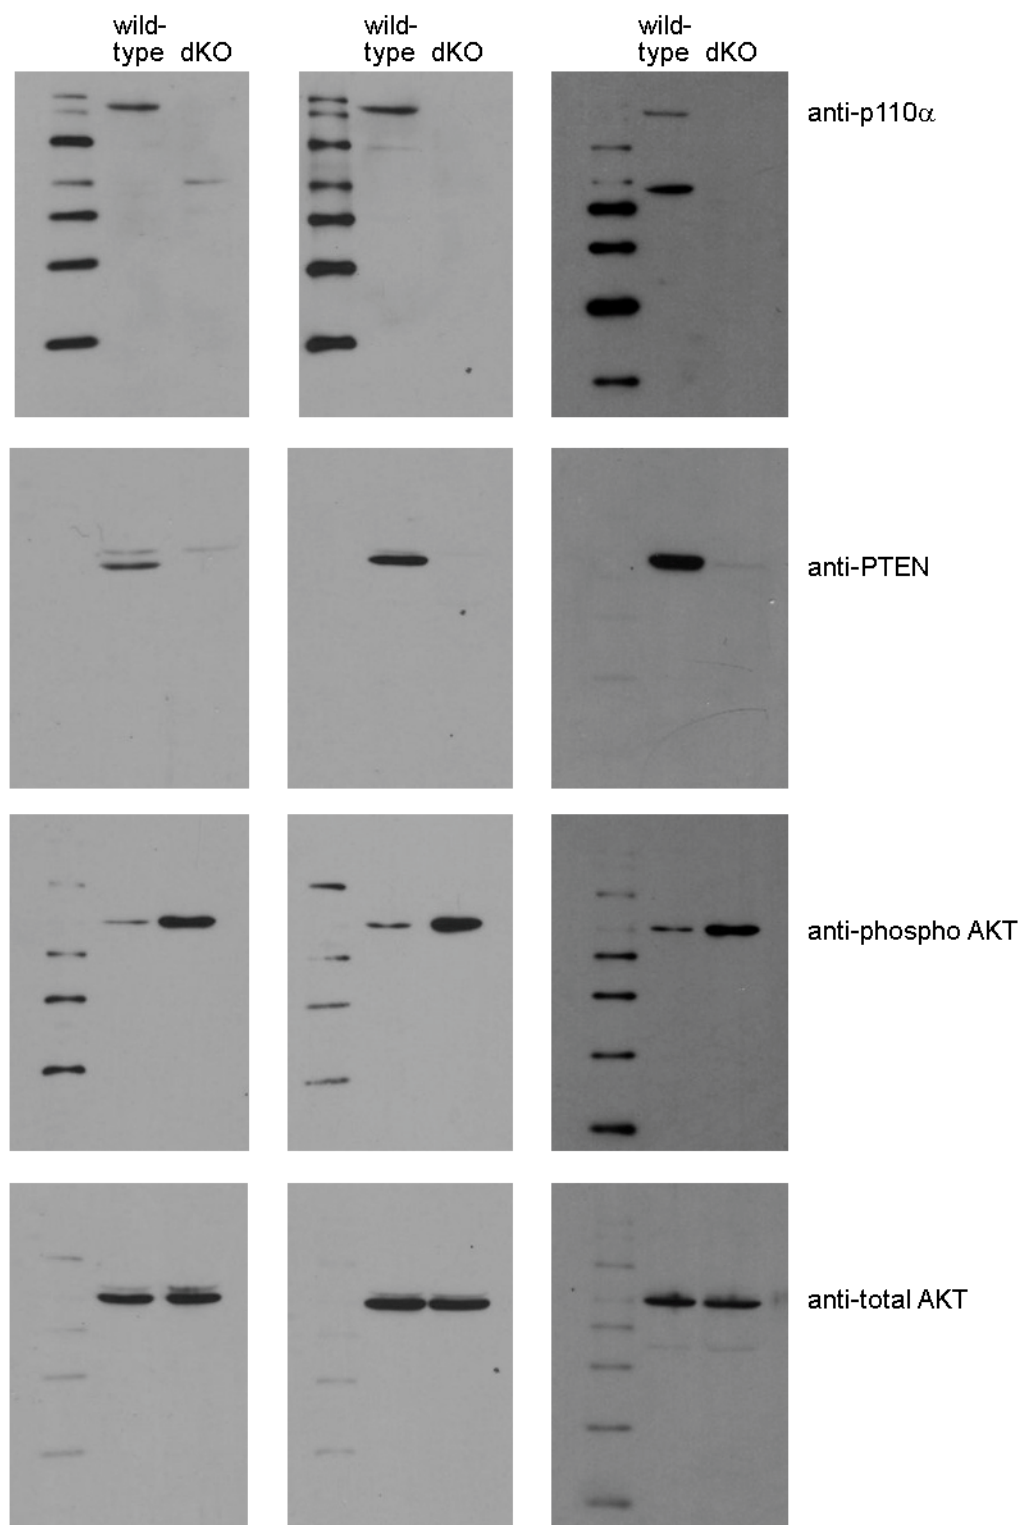

Supplement: s1 [file s1]
